# Supplementary material for: Direct Detection of Shigella in Stool Specimens by Use of a Metagenomic Approach
Source: PubMed Central journal article supplement (PMC5786726; doi:10.1128/jcm.01374-17), 2018-01-24
Supplement: JCM.01374-17_zjm999095800s1.pdf [file JCM.01374-17_zjm999095800s1.pdf]

Supplemental Table S1. The read counts of the 27 stool samples subjected to metagenomics sequencing. MAL = Mali, MOZ = Mozambique, IND = India.

| Sample | Sample ID | Site | Culture | qPCR | Total high quality reads |
|--------|-----------|------|---------|------|--------------------------|
| 1      | 202260    | MAL  | +       | +    | 255853444                |
| 2      | 203032    | MAL  | +       | +    | 370748896                |
| 3      | 203745    | MAL  | +       | +    | 336959130                |
| 4      | 300244    | MOZ  | +       | +    | 267173944                |
| 5      | 302912    | MOZ  | +       | +    | 318564818                |
| 6      | 303061    | MOZ  | +       | +    | 275670712                |
| 7      | 500242    | IND  | +       | +    | 251507850                |
| 8      | 504039    | IND  | +       | +    | 322336854                |
| 9      | 503617    | IND  | +       | +    | 259519220                |
| 10     | 202455    | MAL  | -       | +    | 273141504                |
| 11     | 202742    | MAL  | -       | +    | 304390100                |
| 12     | 203725    | MAL  | -       | +    | 389080142                |
| 13     | 300055    | MOZ  | -       | +    | 293291234                |
| 14     | 300716    | MOZ  | -       | +    | 254650088                |
| 15     | 302016    | MOZ  | -       | +    | 347812514                |
| 16     | 500620    | IND  | -       | +    | 282549862                |
| 17     | 503417    | IND  | -       | +    | 231606090                |
| 18     | 504637    | IND  | -       | +    | 282331220                |
| 19     | 200714    | MAL  | -       | -    | 373848930                |
| 20     | 201361    | MAL  | -       | -    | 357411820                |
| 21     | 202587    | MAL  | -       | -    | 271984392                |
| 22     | 300056    | MOZ  | -       | -    | 387004856                |
| 23     | 300763    | MOZ  | -       | -    | 244645304                |
| 24     | 302001    | MOZ  | -       | -    | 409672600                |
| 25     | 503034    | IND  | -       | -    | 327307332                |
| 26     | 503626    | IND  | -       | -    | 258594624                |
| 27     | 504241    | IND  | -       | -    | 335360728                |

Supplemental Table S2. The interrogated region of 6 *Shigella* virulence genes.

| <b>Gene</b>  | <b>Function</b>                                                       | <b>Accession number</b> | <b>Location</b>   |
|--------------|-----------------------------------------------------------------------|-------------------------|-------------------|
| <i>ipaH</i>  | invasion plasmid antigen H                                            | CP000039                | 186587 - 185588   |
| <i>ipaH3</i> | invasion plasmid antigen H3                                           | CP000038                | 1391081 - 1391611 |
| <i>ial</i>   | invasion associated protein                                           | D50601                  | 17450 - 18449     |
| <i>ShET2</i> | enterotoxin Set2                                                      | Z54211                  | 491 - 1490        |
| <i>virA</i>  | microtubule disruption                                                | D26468                  | 1101 - 2100       |
| <i>virG</i>  | encode icsA involved in actin based mobility and intercellular spread | M22802                  | 2060 - 3059       |

Supplemental Table S3. Pathogen detection in 27 selected diarrheal samples, shown as quantification cycle (Cq). Red represents highly diarrhea-associated quantities, orange diarrhea-associated quantities, yellow represents detection with no association or for pathogens where no Cq cutoff exists (Liu, 2016), and grey denotes no detection.

| Sample                      | Diarrhea associated pathogen with a Cq cutoff |                  |                |           |            |             |       |         |            |               |           |           |                 | Pathogen without a Cq cutoff or diarrhea association |           |             |              |      |       |         |         |             |         |
|-----------------------------|-----------------------------------------------|------------------|----------------|-----------|------------|-------------|-------|---------|------------|---------------|-----------|-----------|-----------------|------------------------------------------------------|-----------|-------------|--------------|------|-------|---------|---------|-------------|---------|
|                             | Shigella/EIEC                                 | adenovirus 40/41 | C. jejuni/coli | H. pylori | Salmonella | V. cholerae | HEPEC | ST-EPEC | astrovirus | norovirus GII | rotavirus | sapovirus | Cryptosporidium | norovirus GI                                         | Aeromonas | B. fragilis | C. difficile | EAEC | aEPEC | LT-EPEC | Ascaris | E. bieneusi | Giardia |
| Shigella culture + / qPCR + | 19                                            | -                | 23             | -         | -          | -           | 21    | -       | 28         | -             | -         | -         | -               | -                                                    | -         | -           | -            | 18   | -     | -       | -       | 30          | 20      |
|                             | 19                                            | -                | 34             | -         | -          | -           | 34    | -       | -          | -             | 28        | -         | -               | -                                                    | -         | -           | -            | -    | -     | 34      | -       | -           | -       |
|                             | 20                                            | -                | -              | -         | -          | -           | -     | 25      | -          | 29            | -         | -         | 29              | -                                                    | -         | -           | -            | 21   | -     | -       | -       | -           | 31      |
|                             | 18                                            | 34               | -              | -         | -          | -           | -     | -       | -          | -             | -         | -         | -               | -                                                    | -         | -           | -            | -    | 33    | -       | -       | -           | 34      |
|                             | 17                                            | 15               | -              | 35        | -          | -           | 27    | 24      | -          | -             | -         | 33        | 32              | -                                                    | -         | 27          | -            | 29   | -     | -       | -       | 23          | 18      |
|                             | 20                                            | 26               | -              | -         | -          | -           | -     | 31      | -          | -             | -         | -         | -               | -                                                    | 32        | -           | -            | 22   | 31    | -       | -       | -           | 32      |
|                             | 19                                            | 26               | -              | -         | -          | -           | -     | -       | -          | -             | -         | -         | -               | -                                                    | -         | -           | -            | 32   | -     | -       | -       | -           | 30      |
|                             | 17                                            | 35               | -              | -         | -          | -           | -     | -       | 19         | -             | 35        | -         | -               | -                                                    | 21        | -           | -            | -    | -     | -       | -       | -           | 33      |
|                             | 19                                            | 28               | -              | -         | -          | -           | -     | -       | -          | -             | -         | -         | -               | -                                                    | -         | -           | -            | -    | -     | -       | -       | -           | 31      |
|                             | Shigella culture - / qPCR +                   | 18               | -              | -         | -          | -           | -     | 18      | -          | -             | -         | -         | -               | -                                                    | -         | -           | -            | -    | -     | -       | -       | -           | -       |
| 19                          |                                               | -                | -              | -         | -          | -           | 13    | 35      | -          | 31            | -         | -         | -               | -                                                    | -         | 33          | -            | 28   | -     | -       | -       | -           | 35      |
| 20                          |                                               | -                | -              | -         | -          | -           | 29    | -       | -          | -             | -         | -         | -               | -                                                    | -         | -           | -            | 23   | -     | -       | -       | -           | 31      |
| 19                          |                                               | -                | -              | -         | -          | -           | 34    | -       | -          | -             | -         | -         | -               | -                                                    | -         | -           | -            | 16   | -     | 34      | -       | -           | 32      |
| 17                          |                                               | 32               | -              | -         | -          | 35          | 34    | -       | -          | -             | -         | -         | -               | -                                                    | -         | -           | -            | 29   | -     | -       | -       | -           | 15      |
| 20                          |                                               | -                | -              | -         | -          | -           | 34    | -       | -          | -             | -         | -         | -               | -                                                    | -         | -           | -            | 18   | -     | -       | -       | -           | -       |
| 18                          |                                               | -                | -              | -         | -          | -           | -     | -       | -          | -             | -         | -         | -               | -                                                    | -         | -           | -            | -    | -     | 31      | -       | -           | 21      |
| 19                          |                                               | -                | -              | 34        | -          | -           | -     | -       | -          | -             | -         | -         | -               | -                                                    | -         | 21          | -            | 18   | -     | -       | -       | -           | -       |
| 19                          |                                               | -                | 25             | -         | -          | -           | -     | -       | -          | -             | -         | -         | 32              | -                                                    | -         | 27          | -            | -    | 26    | 27      | 29      | -           | 19      |
| Shigella culture - / qPCR - |                                               | -                | -              | -         | -          | -           | -     | -       | -          | -             | -         | -         | 29              | 30                                                   | -         | -           | 34           | -    | -     | -       | -       | -           | -       |
|                             | -                                             | 29               | 26             | -         | -          | -           | 32    | -       | -          | 33            | 29        | -         | -               | -                                                    | -         | -           | -            | -    | -     | 28      | -       | 33          | 15      |
|                             | -                                             | -                | -              | -         | 34         | -           | -     | -       | -          | -             | 24        | -         | 17              | 35                                                   | -         | -           | -            | 35   | -     | -       | -       | -           | 20      |
|                             | -                                             | 33               | -              | -         | -          | -           | 32    | -       | -          | -             | -         | 29        | -               | -                                                    | -         | -           | -            | 19   | -     | -       | -       | 35          | 32      |
|                             | -                                             | -                | -              | -         | -          | -           | -     | -       | -          | -             | 24        | 31        | -               | -                                                    | -         | -           | -            | 34   | 30    | -       | -       | 35          | 24      |
|                             | -                                             | 31               | -              | -         | -          | -           | 35    | 32      | -          | -             | -         | -         | 24              | -                                                    | -         | -           | -            | 16   | -     | -       | -       | -           | 24      |
|                             | -                                             | -                | -              | -         | -          | -           | -     | -       | 21         | -             | -         | -         | -               | -                                                    | -         | -           | -            | 22   | 23    | -       | -       | -           | 34      |
|                             | -                                             | -                | 19             | 28        | -          | -           | -     | 17      | -          | 26            | -         | -         | -               | -                                                    | 32        | -           | -            | -    | 22    | -       | -       | -           | 32      |
|                             | -                                             | 17               | 28             | -         | -          | -           | 19    | -       | -          | -             | -         | 31        | -               | -                                                    | -         | -           | -            | 19   | -     | -       | -       | -           | 25      |



Supplemental Table S5. The raw read counts of *Shigella* species in culture+/qPCR+ samples. Highest read counts are bolded if correctly classified the stool culture result and underlined if misclassified the stool culture result.

| Culture identification         | <i>S. flexneri</i> | <i>S. boydii</i> | <i>S. sonnei</i> | <i>S. dysenteriae</i> |
|--------------------------------|--------------------|------------------|------------------|-----------------------|
| <i>S. flexneri</i> serotype 6  | 8606               | <u>41114</u>     | 10176            | 5659                  |
| <i>S. flexneri</i> serotype 3a | 1083131            | 455181           | 739325           | <u>1124807</u>        |
| <i>S. sonnei</i>               | 32255              | 58086            | <b>929797</b>    | 25220                 |
| <i>S. flexneri</i> serotype 2a | <b>32371</b>       | 668              | 2009             | 1528                  |
| <i>S. sonnei</i>               | 6125               | 6917             | <b>164642</b>    | 2292                  |
| <i>S. flexneri</i> serotype 2a | <b>51050</b>       | 10431            | 14378            | 23872                 |
| <i>S. flexneri</i> serotype 3a | <b>21916</b>       | 661              | 2422             | 400                   |
| <i>S. sonnei</i>               | 8523               | 30985            | <b>706606</b>    | 7810                  |
| <i>S. sonnei</i>               | 2738               | 3079             | <b>62117</b>     | 591                   |

Supplemental Table S6. Comparison of precision and recall on the genus level between Kraken and Clark MetaPhlan2, Kaiju on the *Shigella* isolates. The highest precision or sensitivity for each isolate was bolded.

| Isolate ID   | Monophyletic lineage | Genus precision |             |            |       | Genus sensitivity |       |             |       |
|--------------|----------------------|-----------------|-------------|------------|-------|-------------------|-------|-------------|-------|
|              |                      | Kraken          | Clark       | MetaPhlan2 | Kaiju | Kraken            | Clark | MetaPhlan2* | Kaiju |
| PK1010072_SF | S1                   | <b>86.8</b>     | 84.2        | 5.9        | 54.9  | <b>38.4</b>       | 23.5  | 1.7         | 8.6   |
| PK1010438_SF | S1                   | <b>86.7</b>     | 83.8        | 35.8       | 55.6  | <b>37.4</b>       | 22.7  | 2.3         | 8.4   |
| PK1010893_SF | S1                   | <b>87.3</b>     | 85.2        | 29.8       | 56.6  | <b>39.3</b>       | 24.6  | 2.1         | 8.9   |
| PK1011266_SB | S1                   | <b>88.7</b>     | 87.4        | 29.2       | 60.1  | <b>40.0</b>       | 24.8  | 2.2         | 9.2   |
| PK1010319_SS | S2                   | 96.9            | <b>97.1</b> | 55.7       | 63.5  | 36.0              | 21.9  | <b>47.6</b> | 7.4   |
| PK1010319_SF | S5                   | <b>96.2</b>     | 94.5        | 94.4       | 75.4  | 50.6              | 33.0  | <b>90.6</b> | 12.7  |
| PK1010339_SF | S5                   | 99.2            | <b>99.4</b> | 93.5       | 81.9  | 54.1              | 35.9  | <b>81.8</b> | 14.2  |
| PK1010355_SF | S5                   | <b>94.9</b>     | 94.0        | 89.1       | 73.3  | 46.7              | 29.2  | <b>68.6</b> | 11.2  |
| PK1010912_SF | S5                   | <b>95.1</b>     | 92.7        | 90.6       | 70.5  | 47.6              | 29.8  | <b>81.6</b> | 11.4  |
| PK1010943_SF | S5                   | <b>91.5</b>     | 89.4        | 92.5       | 66.0  | 45.9              | 28.6  | <b>65.0</b> | 10.9  |
| PK1011037_SF | S5                   | <b>95.8</b>     | 93.6        | 90.7       | 71.4  | 47.9              | 30.3  | <b>80.6</b> | 11.6  |
| PK1011283_SF | S5                   | 99.1            | <b>99.4</b> | 93.6       | 81.1  | 53.5              | 35.6  | <b>77.6</b> | 14.2  |

\*metaphlan2 gives an estimation of the number of reads that should match that taxa based on the marker gene detection

Supplemental Figure S1. Comparison of metagenomics sequencing reads versus qPCR Cq values. Only DNA pathogens with more than 5 positives were plotted, i.e. qPCR positive with Cq < 35. Regression was fit for Ct < 30.

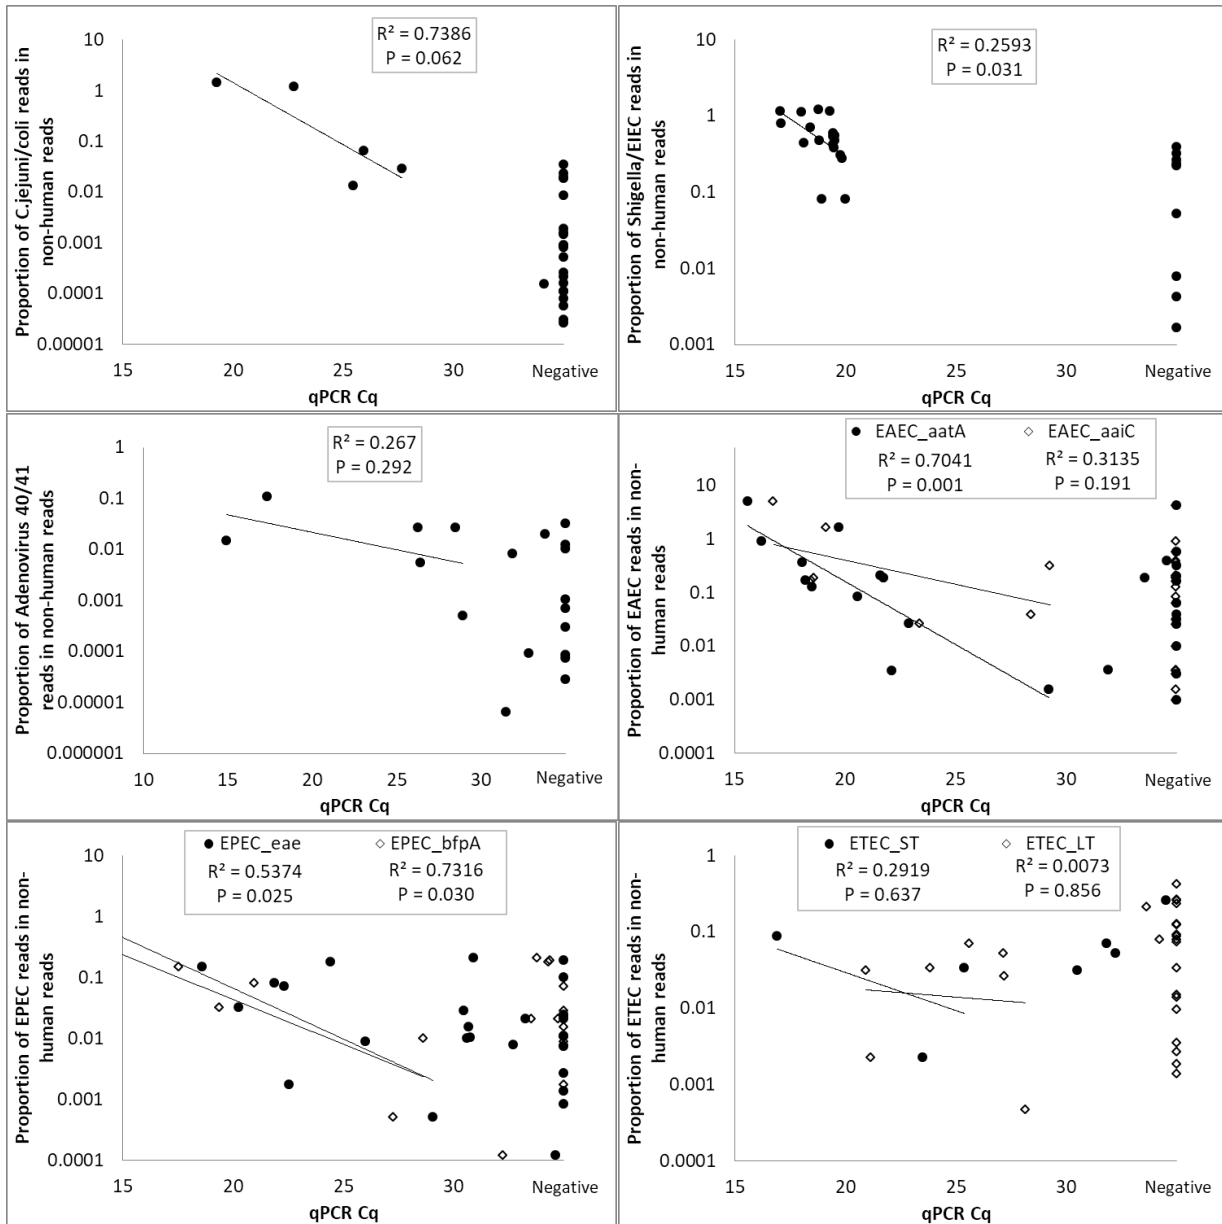

## Reference

**Hazen TH, Leonard SR, Lampel KA, Lacher DW, Maurelli AT, Rasko DA.** 2016. Investigating the relatedness of Enteroinvasive Escherichia coli to other E. coli and Shigella Isolates by using comparative genomics. *Infect Immun* **84**:2362-2371.

**Liu J, Platts-Mills JA, Juma J, Kabir F, Nkeze J, Okoi C, Operario DJ, Uddin J, Ahmed S, Alonso PL, Antonio M, Becker SM, Blackwelder WC, Breiman RF, Faruque AS, Fields B, Gratz J, Haque R, Hossain A, Hossain MJ, Jarju S, Qamar F, Iqbal NT, Kwambana B, Mandomando I, McMurry TL, Ochieng C, Ochieng JB, Ochieng M, Onyango C, Panchalingam S, Kalam A, Aziz F, Qureshi S, Ramamurthy T, Roberts JH, Saha D, Sow SO, Stroup SE, Sur D, Tamboura B, Taniuchi M, Tennant SM, Toema D, Wu Y, Zaidi A, Nataro JP, Kotloff KL, Levine MM, Hupt ER.** 2016. Use of quantitative molecular diagnostic methods to identify causes of diarrhoea in children: a reanalysis of the GEMS case-control study. *Lancet* **388**:1291-1301.
